# Supplementary material
Source: publisher figshare collection journal article supplement (https://sage.figshare.com/ndownloader/files/22256793)
Supplement: Supplementary file 1 [file 22256793]

**Supplementary table 2 – Prospective associations between two-year change in screen time categories and systolic and diastolic blood pressure at 5 years of age**

|                                                         | <b>Model 1</b><br><b>Beta coefficient (95% CI)</b> | <b>Model 2</b><br><b>Beta coefficient (95% CI)</b> | <b>Model 3</b><br><b>Beta coefficient (95% CI)</b> | <b>Model 4</b><br><b>Beta coefficient (95% CI)</b> | <b>Model 5</b><br><b>Beta coefficient (95% CI)</b> |
|---------------------------------------------------------|----------------------------------------------------|----------------------------------------------------|----------------------------------------------------|----------------------------------------------------|----------------------------------------------------|
| <i>Systolic blood pressure percentiles (n = 628)</i>    |                                                    |                                                    |                                                    |                                                    |                                                    |
| ≤2 hours/day at baseline and follow-up                  | (reference)                                        | (reference)                                        | (reference)                                        | (reference)                                        | (reference)                                        |
| < 2 hours/day at baseline and ≥2 hours/day at follow-up | -1.46 (-5.18;2.27)                                 | -1.44 (-5.18;2.30)                                 | -1.40 (-5.14;2.33)                                 | -1.42 (-5.15)                                      | -1.36 (-5.11;2.40)                                 |
| ≥2 hours/day at baseline and < 2 hours/day at follow-up | -8.44 (-18.06;1.18)                                | -8.49 (-18.15;1.18)                                | -8.32 (-17.95;1.32)                                | -8.15 (-17.77;1.47)                                | -8.08 (-17.76;1.60)                                |
| ≥2 hours/day at baseline and follow-up                  | -0.80 (-7.85;6.26)                                 | -0.79 (-7.92;6.35)                                 | -0.42 (-7.55;6.71)                                 | -1.08 (-8.14;5.97)                                 | -0.70 (-7.92;6.50)                                 |
| <i>Diastolic blood pressure percentile (n = 628)</i>    |                                                    |                                                    |                                                    |                                                    |                                                    |
| ≤2 hours/day at baseline and follow-up                  | (reference)                                        | (reference)                                        | (reference)                                        | (reference)                                        | (reference)                                        |
| < 2 hours/day at baseline and ≥2 hours/day at follow-up | -0.10 (-3.42;3.22)                                 | -0.07 (-3.39;3.25)                                 | -0.01 (-3.34;3.31)                                 | -0.26 (-3.58;3.07)                                 | -0.14 (-3.48;3.20)                                 |
| ≥2 hours/day at baseline and < 2 hours/day at follow-up | -5.53 (-14.09;3.04)                                | -5.50 (-14.10;3.09)                                | -5.34 (-13.92;3.23)                                | -5.52 (-14.08;3.05)                                | -5.31 (-13.91;3.29)                                |
| ≥2 hours/day at baseline and follow-up                  | 1.64 (-4.64;7.92)                                  | 1.20 (-5.14;7.53)                                  | 2.21 (-4.12;8.55)                                  | 1.27 (-5.00;7.56)                                  | 1.40 (-5.00;7.80)                                  |

Table 3: Beta coefficients (95% CI) are two-year change in blood pressure percentiles by screen time category. Model 1 included adjustments for blood pressure percentile at baseline, birthweight, maternal educational level, maternal ethnicity, fish consumption at baseline and follow-up, and follow-time. Model 2: Included all variables in model 1 and additional adjustment for BMI at baseline and follow-up. Model 3: Included all variables in model 1 and additional adjustment for habitual sleep duration at baseline and follow-up. Model 4: Included all variables in model 1 and additional adjustment for physical activity level at baseline and follow-up. Model 5: Included all variables in model 1, 2, 3, and 4.
